1 Funding USDA

2 TITLE: Rapid response of nitrogen cycling gene transcription to labile carbon amendments in a

3 soil microbial community

4 RUNNING TITLE: Rapid transcription of nitrogen cycling genes in soil

5 Authors:

6 Peter F. Chuckran<sup>a#</sup>, Viacheslav Fofanov<sup>b,c</sup>, Bruce A. Hungate<sup>a</sup>, Ember M Morrissey<sup>d</sup>, Egbert

7 Schwartz<sup>a</sup>, Jeth Walkup<sup>d</sup>, Paul Dijkstra<sup>a</sup>

8 <sup>a</sup>Center for Ecosystem Science and Society (ECOSS) and Department of Biological Sciences,

9 Northern Arizona University, Flagstaff, AZ, USA

10 <sup>b</sup>Pathogen and Microbiome Institute, Northern Arizona University, Flagstaff, AZ, USA

11 <sup>c</sup>School of Informatics, Computing and Cyber Systems, Northern Arizona University, Flagstaff,

12 AZ, USA

13 <sup>d</sup>Division of Plant and Soil Sciences, West Virginia University, Morgantown, WV, USA

14 #Corresponding author: [pfc25@nau.edu](mailto:pfc25@nau.edu), [pfchuckran@gmail.com](mailto:pfchuckran@gmail.com)

15

16 **ABSTRACT:**

17           Episodic inputs of labile carbon (C) to soil can rapidly stimulate nitrogen (N)  
18 immobilization by soil microorganisms. However, the transcriptional patterns that underlie this  
19 process remain unclear. In order to better understand the regulation of N cycling in soil microbial  
20 communities, we conducted a 48 h laboratory incubation with an agricultural soil where we  
21 stimulated the uptake of inorganic N by amending the soil with glucose. We analyzed the  
22 metagenome and metatranscriptome of the microbial communities at four timepoints that  
23 corresponded with changes in N availability. The relative abundances of genes remained largely  
24 unchanged throughout the incubation. In contrast, glucose addition rapidly increased  
25 transcription of genes encoding for ammonium and nitrate transporters, enzymes responsible for  
26 N assimilation into biomass, and genes associated with the N regulatory network. This  
27 upregulation coincided with an increase in transcripts associated with glucose breakdown and  
28 oxoglutarate production, demonstrating a connection between C and N metabolism. When  
29 concentrations of ammonium were low, we observed a transient upregulation of genes associated  
30 with the nitrogen fixing enzyme nitrogenase. Transcripts for nitrification and denitrification were  
31 downregulated throughout the incubation, suggesting that dissimilatory transformations of N  
32 may be suppressed in response to labile C inputs in these soils. These results demonstrate that  
33 soil microbial communities can respond rapidly to changes in C availability by drastically  
34 altering the transcription of N cycling genes.

35

36 **IMPORTANCE:**

37 A large portion of activity in soil microbial communities occurs in short time frames in response  
38 to an increase in C availability, affecting the biogeochemical cycling of nitrogen. These changes

39 are of particular importance as nitrogen represents both a limiting nutrient for terrestrial plants as  
40 well as a potential pollutant. However, we lack a full understanding of the short-term effects of  
41 labile carbon inputs on the metabolism of microbes living in soil. Here, we found that soil  
42 microbial communities responded to labile carbon addition by rapidly transcribing genes  
43 encoding proteins and enzymes responsible for inorganic nitrogen acquisition, including nitrogen  
44 fixation. This work demonstrates that soil microbial communities respond within hours to carbon  
45 inputs through altered gene expression. These insights are essential for improved understanding  
46 of the microbial processes governing soil organic matter production, decomposition, and nutrient  
47 cycling in natural and agricultural ecosystems.

48

## 49 INTRODUCTION

50 Inorganic nitrogen (N) availability in soil dictates several ecosystem-level processes such  
51 as plant growth (1), greenhouse gas emissions in the form of nitrous oxide (2), and  
52 eutrophication from runoff (3). The transformation of N by soil microbial communities is  
53 directly tied to the pool of bioavailable N in soils (4, 5). Thus, understanding the controls of N  
54 metabolism in soil microbes is key to determining, and potentially managing (6), the cycling of  
55 N in soils. Although genes and regulatory mechanisms for microbial N cycling processes have  
56 long-been identified in laboratory studies (7–9), the short-term dynamics and controls of N  
57 cycling in complex soil communities remain poorly understood. The availability of shotgun  
58 sequencing technologies to analyze microbial functioning in soil communities provides an  
59 opportunity to enhance our understanding of microbially mediated soil N cycling.

60 Measuring short-term responses of soil microbial populations to changes in the  
61 environment is crucial in understanding the role of microbes in biogeochemical cycling. Most  
62 biogeochemical transformations occur during short periods of intense microbial activity, when  
63 the active fraction of microbes may be up to 20 times higher than in bulk soil (10). This  
64 stimulation is often the result of a localized increase in nutrient concentrations, such as in the  
65 rhizosphere or an area of fresh organic matter decomposition. Despite the importance of these  
66 “hot moments”, only a few studies (e.g. 11, 12) have tracked changes in N-cycling gene  
67 transcription in soils.

68 Notably, the short-term (hours to days) transcriptional response of N-cycling genes in  
69 response to labile C inputs has yet to be determined. Microbial communities experience sudden  
70 changes in C and N availability associated with plant root exudation (13), trophic interactions  
71 (14, 15), and litter leachate (16). Since soil microbes are typically limited by labile C and energy

72 (17–19), the addition of a C-rich substrate is expected to stimulate growth and activity (20),  
73 increasing the demand for N (21). Whether N is derived from the uptake of organic N present in  
74 the substrate or mineral N available in the soil depends largely on the C:N of the substrate (22).  
75 For example, in Yang et al. 2016 (23) soil microbial communities assimilated organic N during  
76 the mineralization of added glycine, but in the presence of glucose the mineralization of glycine  
77 was initially suppressed and ammonium served as the main source of N. Simple sugars such as  
78 glucose have accordingly been shown to influence protease activity (24). The metabolic  
79 pathways for N immobilization have been well characterized *in vitro* (25). A majority of N  
80 assimilation into biomass occurs through the conversion of  $\text{NH}_4^+$  into the amino acids glutamine  
81 and glutamate, which are used as sources of N for all other amino acids. Under low-to-moderate  
82 intracellular concentrations of  $\text{NH}_4^+$ , the enzymes glutamine synthetase (GS; encoded by *glnA*)  
83 and glutamate synthase (GOGAT; *gltS*) convert  $\text{NH}_4^+$  to glutamate in a two-step reaction  
84 referred to as the GS-GOGAT pathway (26). Under high concentrations of  $\text{NH}_4^+$ , the enzyme  
85 glutamate dehydrogenase (GDH; *gudB*, *gdhA*) converts  $\text{NH}_4^+$  directly to glutamate in a one-step  
86 reversible reaction (27).

87         Since both the GS-GOGAT pathway and GDH require N as  $\text{NH}_4^+$ , other forms of  
88 inorganic N must be converted to ammonium before conversion into biomass. In the case of  
89 nitrate and nitrite, the reduction to ammonium occurs through either assimilatory nitrate  
90 reduction or, under anoxic conditions, dissimilatory nitrate reduction to ammonium (DNRA;  
91 Table S1) (28). The conversion of atmospheric  $\text{N}_2$  to ammonium by diazotrophs is catalyzed by  
92 the enzyme nitrogenase (*nifD*, *nifH*) (29).

93         The mechanisms regulating N uptake in response to C have been extensively studied *in*  
94 *vitro* (8, 25). The complex regulatory network includes a specialized sigma factor ( $\sigma^{54}$ ; *rpoN*),

95 three transcriptional regulators, and a phosphorylation cascade comprised of post-modification  
96 enzymes, PII proteins, and a two-component regulator (30). The activity of many of the enzymes  
97 and proteins in the phosphorylation cascade is tightly controlled by cellular concentrations of  
98 glutamine and oxoglutarate (31). Since the concentration of oxoglutarate is impacted by the  
99 activity of the TCA cycle, the regulation of N cycling is directly tied to C metabolism (32).

100 Carbon substrate addition is also thought to influence dissimilatory N cycling processes  
101 such as nitrification and denitrification. In nitrification, ammonia is oxidized to nitrite and then  
102 nitrate. Often the steps of this process occur in different organisms (33), however complete  
103 ammonia oxidizers have also been described (34, 35).” In denitrification, nitrate is reduced to  
104 nitrite, nitric oxide, and then nitrous oxide and N<sub>2</sub>. Nitrification and denitrification, beyond their  
105 ability to draw from the pools of ammonium and nitrate, also represent important avenues of  
106 inorganic N loss from soils via nitrate leaching and the release of N<sub>2</sub> and nitrous oxide, a potent  
107 greenhouse gas (36). The addition of glucose is expected to have both positive and negative  
108 effects on nitrification. Rates of autotrophic nitrification tend to decrease as heterotrophs  
109 outcompete autotrophic nitrifiers for ammonium (37), but rates of heterotrophic nitrification may  
110 increase after labile C inputs (38). Denitrification is more directly influenced by C availability  
111 and quality (39), and the abundance of mRNA transcripts associated with denitrification was  
112 stimulated with the addition of glucose in anoxic soil microcosms (40).

113 Despite our knowledge of the mechanisms and controls of N cycling and N metabolism,  
114 we do not yet fully understand how these genes are regulated within complex soil microbial  
115 communities. Metatranscriptomics allows us to capture the transcriptional profile of a microbial  
116 community, providing insight into the potential activity of a community at a given moment in  
117 time (41–43). Many studies utilizing this technique have focused on the influence of ecosystem

118 level characteristics/properties on transcription, such as land-use, above ground cover,  
119 seasonality, and climate (e.g. 38–43). Although these studies contribute greatly to our  
120 understanding of community gene transcription, there is additional need to study the dynamic  
121 short-term responses of microbial communities to changes in C and N availability (50).

122         In order to fill this knowledge gap, we conducted a soil incubation study where we  
123 induced rapid immobilization of inorganic N by adding glucose. We selected glucose as it is a  
124 form of labile C commonly found in soils (51), and has been widely used to alleviate C limitation  
125 in soil microbial communities as a means to study growth (52, 53) and metabolic activity (50).  
126 We analyzed metagenomes and metatranscriptomes of the soil microbial community using high  
127 throughput shotgun sequencing to identify the response of N cycling genes over a 48-hour  
128 period. We hypothesized that the abundance of N-cycling genes in the metagenomes would not  
129 significantly change throughout the course of the 48-hour incubation, but that changes in activity  
130 would be immediately detected in the metatranscriptomes. We further hypothesized that there  
131 would be an upregulation of genes associated with inorganic N transport, N assimilation into  
132 biomass, and N metabolism regulation in response to labile C inputs, and that the abundance of  
133 these transcripts would track the concentrations of inorganic N. This work provides an in-depth  
134 look at the short-term transcriptional response of soil microbial communities during a central  
135 biogeochemical process in soils.  
136

137 METHODS

138 *Soil Sampling and Site Description*

139           Soils were collected in the fall of 2017 from a long-term crop rotation experiment at the  
140 West Virginia University Certified Organic Farm near Morgantown, West Virginia, USA  
141 (39.647502° N, 79.93691° W; 243.8 – 475.2 m a.s.l.) (54, 55). Samples were taken from plots  
142 subject to a four-year conventionally tilled crop cycle consisting of corn, soybean, wheat and a  
143 mix of kale and cowpea. Manure was added every two years (during corn and wheat planting),  
144 and rye-vetch was added as a winter cover crop before replanting corn in the spring. From each  
145 plot, 10 cores 0-10 cm depth were collected and pooled.

146

147 *Laboratory Incubation*

148           Soil samples were shipped on ice to Northern Arizona University in Flagstaff, Arizona,  
149 USA. Soils from 3 plots were pooled, cleaned of roots and large debris, passed through a 2 mm  
150 sieve, and distributed between 64 glass Mason jars (500 mL), generating microcosms containing  
151 30 g of soil each. The soil was preincubated at lab temperature (~ 23 °C) for 2 weeks prior to the  
152 glucose addition.

153           The microcosms received 1.6 mL of 0.13 M glucose solution, which added 0.7 mg of  
154 glucose C g<sup>-1</sup> dry soil and raised the moisture content to 60% water holding capacity.

155 Concentrations of glucose in this range have been demonstrated to stimulate soil microbial  
156 communities without creating a detrimental increase in osmotic pressure (52). Moreover, a brief  
157 trial incubation was conducted to ensure that this concentration of glucose would stimulate CO<sub>2</sub>  
158 production. Soils were incubated at lab temperature (~ 23 °C) under ambient lighting, but never  
159 direct sunlight. Every 4 hours, over a 48 h period, 5 jars were randomly selected and



160 destructively sampled. From each jar, we measured headspace CO<sub>2</sub> concentration, concentrations  
161 of NO<sub>3</sub><sup>-</sup> and NH<sub>4</sub><sup>+</sup>, and microbial biomass. A portion of each sample was immediately frozen  
162 using liquid N<sub>2</sub> and stored at -80°C for DNA and RNA extraction.

163         Since the addition of water may stimulate community activity and respiration, especially  
164 when starting with very dry soil (56, 57), we measured respiration in a parallel incubation  
165 wherein the same volume of water was added without glucose. Headspace CO<sub>2</sub> from these jars  
166 was measured and compared against the glucose additions in order to determine the overall effect  
167 of glucose and water on microbial respiration.

168

#### 169 *Biogeochemical Measurements and Analysis*

170         To measure soil NO<sub>3</sub><sup>-</sup> and NH<sub>4</sub><sup>+</sup> concentration, 8 g of soil from each destructively  
171 sampled jar were added to 40 ml of 1 M KCl solution, shaken for 1 hour, and filtered through  
172 Whatman no. 1 filter paper. Extracts were analyzed on a SmartChem 200 Discrete Analyzer  
173 (Westco Scientific Instruments, Brookfield, Connecticut, USA). Microbial biomass was  
174 measured using an extraction-fumigation-extraction technique (58), consisting of a 0.5 M K<sub>2</sub>SO<sub>4</sub>  
175 extraction followed by a subsequent K<sub>2</sub>SO<sub>4</sub> extraction with the addition of chloroform. The first  
176 extraction provided an estimate of the K<sub>2</sub>SO<sub>4</sub> extractable organic C and N from each sample,  
177 while the second extraction provided an estimate of microbial biomass C (MBC) and N (MBN).  
178 Concentrations of extractable organic C and N were measured on a TOC-L (Shimadzu Corp,  
179 Kyoto, Japan). The concentration of CO<sub>2</sub> from the headspace of each microcosm was measured  
180 using a LI-6262 CO<sub>2</sub>/H<sub>2</sub>O Analyzer (Licor Industries, Omaha, Nebraska, USA) as described in  
181 Dijkstra et al. (2011) (59).

182

183 *DNA and RNA Extraction and Sequencing*

184 We extracted DNA and RNA just before ( $t_0$ ) and 8 ( $t_8$ ), 24 ( $t_{24}$ ), and 48 ( $t_{48}$ ) h after  
185 glucose addition ( $n=4$ ). DNA and RNA were extracted using the RNeasy Powersoil Total RNA  
186 Kit (Qiagen) according to manufacturer instructions. DNA was separated from RNA using the  
187 RNeasy PowerSoil DNA Elution Kit (Qiagen). RNA samples were treated with RNase-Free  
188 DNase Set (Qiagen) to remove any DNA. Nucleic acid concentrations were determined with a  
189 Qubit fluorometer (Invitrogen, Carlsbad, California, USA), and purity was assessed with a  
190 NanoDrop ND-1000 spectrophotometer (Nanodrop Technologies, Wilmington, Delaware, USA).  
191 High-quality samples were sent to the Joint Genome Institute (JGI) for sequencing (60). Paired-  
192 end, 2 x 151 bp, libraries were prepared using the Illumina NovaSeq platform (Illumina Inc., San  
193 Diego, California, USA). Raw sequence reads were uploaded to the JGI genome portal  
194 (<https://genome.jgi.doe.gov/portal/>) under GOLD project ID Gs0135756. A more detailed  
195 description of the sequencing can be found in the data release (61).

196

197 *Metagenome and Metatranscriptomic Analysis*

198 Metatranscriptomes were assembled by JGI using MEGAHIT v1.1.2 (62) (parameters  
199 “megahit —k-list 23,43,63,83,103,123 —continue -o out.megahit”) and metagenomes were  
200 assembled using SPAdes version 3.13.0 (63). Assembled metatranscriptomes and metagenomes  
201 were uploaded to the Integrated Microbial Genomes and Microbiomes (IMG/M) (64) pipeline for  
202 annotation. Full details of the bioinformatics pipeline, as well as SRA reference numbers can be  
203 found in the data release (61). From IMG/M we retrieved the number of reads for all genes  
204 attributed to functional orthologs in the Kyoto Encyclopedia of Genes and Genomes (KEGG)  
205 Orthology database (65), as well as taxonomic annotations against the IMG database. Contigs are

206 available through the JGI genome portal, and taxonomic and functional annotations of these  
207 contigs are available on the IMG/M database (<http://img.jgi.doe.gov>), under GOLD project ID  
208 Gs0135756. JGI Genome ID's for each sample, as well as sample metadata, can be found in  
209 Chuckran et al (2020; 61).

210 Normalization of KEGG functional annotations was performed using the Bioconductor  
211 (66) program DESeq2 (67) in R. DESeq2 uses a negative binomial distribution to normalize read  
212 counts and estimates average  $\log_2$  fold change (LFC) between harvests. Significant LFCs for  
213 each KEGG functional gene and transcript were determined through both a likelihood ratio test  
214 (for overall significance) and Wald test (for specific contrasts between timepoints) provided in  
215 DESeq2. Significance for both tests were assumed as a false discover rate (FDR)  $< 0.01$ . Prior to  
216 analysis, genes with less than 60 reads summed over all samples were discarded in an effort to  
217 reduce the FDR correction and improve detection of significant LFCs (68).

218 To assess differences in genes and transcripts composition over time, we performed  
219 permutational multivariate analysis of variance (PERMANOVA) on our metagenomes and  
220 metatranscriptomes. PERMANOVAs were conducted using Bray-Curtis dissimilarity matrices of  
221 the square root transformed normalized read counts with 999 permutations. A SIMPER analysis  
222 was used to determine genes which most strongly influenced differences between harvests.

223 PERMANOVAs and SIMPER analyses were conducted using the vegan package (69) for R.

224 To assess the response of N metabolism to the addition of glucose, KEGG Orthology  
225 identifiers (K numbers) were grouped according to KEGG pathways and modules associated  
226 with N cycling (70), and K numbers representing regulatory genes controlling N metabolism  
227 were identified (8, 25) (Table S1). The response of C metabolism was determined by grouping  
228 K numbers by KEGG modules associated with glucose uptake, specifically the Entner-Doudoroff

229 pathway (KEGG module M0008), TCA cycle (M00009), pentose phosphate pathway (M00004),  
230 gluconeogenesis (M00003), and Glycolysis (M00001). From the TCA cycle, we also determined  
231 the response of isocitrate dehydrogenase (*icd*), which produces oxoglutarate, an important  
232 metabolite linking C and N metabolism (32). Counts and LFCs for K numbers were then  
233 averaged for each module to assess the overall response for each process. Results were  
234 visualized using the ggplot2 package (71) in R v 3.6.1 (72).  
235

## 236 RESULTS

### 237 *Biogeochemical Measurements*

238           The concentration of  $\text{NO}_3^-$  decreased in the 24 hours after glucose addition and remained  
239 low for the remainder of the incubation (Fig. 1A). The concentration of  $\text{NH}_4^+$  also decreased  
240 during the first 24 hours of the incubation and increased thereafter (Fig. 1B). Rates of  $\text{CO}_2$   
241 production increased from 4-16 hours and then decreased from 28-48 hours in response to  
242 glucose (Fig. 1C). We found that the addition of water only slightly influenced  $\text{CO}_2$  production  
243 (Fig. S1), indicating that the majority of the stimulation was due to the addition of labile C.  
244  $\text{K}_2\text{SO}_4$  extractable organic carbon decreased for the first 20 hours and plateaued thereafter (Fig.  
245 1D). Based on these biogeochemical measurements, we selected 4 timepoints ( $t_0$ ,  $t_8$ ,  $t_{24}$ , and  $t_{48}$ )  
246 from which we extracted DNA and RNA. These timepoints captured distinct phases of C and N  
247 availability that enabled us to test our hypotheses.

248           Microbial biomass C (MBC) moderately decreased throughout the incubation (Fig. S2A)  
249 and microbial biomass N (MBN) remained constant (Fig. S2B). Bacteria may exhibit some  
250 stoichiometric plasticity in response to nutrient inputs (73), however a decrease in biomass C:N  
251 in response to C inputs is counter-intuitive. Since the method of microbial biomass extraction  
252 used involves two extractions on the same sample (one before and after fumigation), incomplete  
253 extraction of the added glucose in the first extraction could result in an artificially high estimate  
254 of biomass C. We believe that it is far more likely that microbial biomass and stoichiometry did  
255 not change, and that changes in estimated MBC are likely the result of unextracted glucose  
256 remaining from the initial  $\text{K}_2\text{SO}_4$  extraction.

257

### 258 *Metagenomic and Metatranscriptomic Assembly and Annotation*

259 Out of 16 soil samples from which DNA and RNA were extracted, 12 were successfully  
260 sequenced and assembled for metagenomic analysis and all 16 for metatranscriptomic analysis.  
261 For the metagenomes, the proportion of genes successfully annotated against the KEGG database  
262 varied from 23.4% to 25.6% of all genes per sample. Of the 6,876 functional KEGG orthologs  
263 identified in the metagenome analysis, 671 genes were in higher abundance while 332 were  
264 present in lower abundance (FDR < 0.01) after the addition of glucose. Glucose caused a shift in  
265 the relative abundance of functional genes (PERMANOVA,  $F_{3,11} = 3.24$ ,  $P < 0.01$ ; Fig. 2A). The  
266 genes that were most different in gene abundance relative to  $t_0$  varied for each timepoint  
267 (SIMPER analysis; Table S3A), and not one of these genes was directly related to N uptake.  
268 Among these were the subunits of RNA polymerase *rpoB* and *rpoC*, which were in slightly  
269 lower abundance at  $t_8$  (LFC -0.1, FDR > 0.1), and the regulatory gene for the lac operon, *lacI*,  
270 which was in a greater abundance at  $t_{24}$  and  $t_{48}$  (LFC 0.7, FDR < 0.01). The largest changes were  
271 found at  $t_{24}$  for low-abundant spore germination proteins (Table S3B), specifically *gerKC*  
272 (KO6297) and *yfkQ* (K06307) which were 8.8 and 7.4 LFC more abundant than at  $t_0$ .

273 The proportion of transcripts successfully annotated against the KEGG database varied  
274 between 12.6% and 32% of all transcripts in a metatranscriptome. Transcripts for 5,448  
275 functional genes were identified, of which 1,141 increased and 855 decreased in response to  
276 glucose. A PERMANOVA indicated significant shifts in the abundance of transcripts between  
277 timepoints ( $F_{3,15} = 8.07$ ,  $P < 0.01$ ; Fig. 2B). Transcripts encoding for *amt* and *glnA* contributed  
278 the most to dissimilarity with  $t_0$  (SIMPER analysis), combined they explained 1% of the  
279 differences at  $t_8$ , 1% of differences at  $t_{24}$ , and 0.9% of differences at  $t_{48}$ .

280

281 *Gene and Transcript Abundance of Nitrogen Cycling Processes*

282 The abundance of N cycling genes was generally stable over time (Fig. 3A), with changes  
283 in gene abundance often being several orders of magnitude smaller than changes in transcript  
284 abundances. For metatranscriptomes, many genes associated with N uptake were highly  
285 upregulated in response to glucose (Fig. 3). Expression of genes encoding the GS-GOGAT  
286 pathway (GS - *glnA*; GOGAT - *gltS*, *gltD*, *gltB*) was consistently upregulated after glucose  
287 addition (FDR < 0.01), peaking at 8 h (Fig. 3B, Table S2). We did not find a similar trend for  
288 transcripts associated with glutamate dehydrogenase (GDH: *gudB*, *gdhA*). Instead we found  
289 variable increases and decreases in the expression for these genes which corresponded with  
290 different classes of GDH enzymes (Fig. 3B Table S2). In prokaryotes, GDH often uses NADH  
291 (EC 1.4.1.2), NADPH (EC 1.4.1.4) as cofactors, while GDH in eukaryotes can use both  
292 (NAD(P)H; EC 1.4.1.3) (74). Transcription of genes for EC 1.4.1.4 significantly increased early  
293 ( $t_8$ , LFC  $1.542 \pm 0.312$ ; FDR < 0.01), and transcription for EC 1.4.1.2 trended higher later ( $t_{48}$ ,  
294 LFC  $2.229 \pm 0.884$ ; FDR < 0.1). The eukaryotic EC 1.4.1.2 gene GDH2 (K15371) was  
295 upregulated at  $t_{24}$  (LFC  $1.350 \pm 0.434$ ; Table S2; FDR < 0.01) and EC 1.4.1.3 was slightly  
296 downregulated throughout (significantly at  $t_8$ , FDR < 0.01).

297 The abundance of transcripts encoding the ammonium transporter AmtB (*amt*) was  
298 significantly (FDR < 0.01) higher after glucose addition throughout the 48-h incubation (Fig. 3B,  
299 Table S2), peaking at  $t_8$ , where it was 16-fold higher than at  $t_0$  (41,366 transcripts at  $t_8$  vs 2,539 at  
300  $t_0$ ). A similar upregulation was found for genes associated with nitrate and nitrite transport across  
301 the membrane – 1500-fold increases compared to  $t_0$  (from 2.6 to almost 2800 transcripts per  
302 sample at  $t_{24}$ ; Fig. 3B).

303 Genes associated with assimilatory nitrate reduction (Fig. 3; Table S2) were strongly  
304 upregulated at  $t_8$  and remained upregulated over the 48 h incubation period. In contrast, we found

305 variable responses of genes associated with DNRA. Most genes associated with the dissimilatory  
306 reduction of nitrate to nitrite were downregulated or not significantly affected, with a few  
307 exceptions. Nitrate reductase gamma subunits (*narI/narV*) were upregulated at  $t_{24}$  and  $t_{48}$ , and the  
308 genes *nirB* and *nirD*, which encode the small and large subunit of the cytosolic enzyme nitrite  
309 reductase, were significantly (FDR < 0.01) upregulated throughout the incubation (LFC 6.18 to  
310 7.70; Fig. 3B). In contrast to these enzymes, abundance of transcripts that encode a periplasmic  
311 cytochrome c nitrite reductase (*nrfA* and *nrfH*) did not significantly change in response to C  
312 amendment.

313 Expression of all genes involved with nitrification were downregulated in response to  
314 glucose, and a majority of those genes (5 of 6) were significantly (FDR < 0.01) downregulated at  
315 some point during the incubation (Fig. 3B). Similarly, expression for most denitrification genes  
316 were downregulated throughout the incubation, with the exception of *narI* and *narV*, which  
317 encode for gamma subunits of nitrate reductase.

318 Transcripts for three genes that encode subunits of nitrogenase (*nifK*, *nifD*, and *nifH*)  
319 were detected, all of which were at very low abundance at  $t_0$ ,  $t_8$ , and  $t_{48}$ . Only at  $t_{24}$  did we  
320 observe a strong significant (FDR < 0.01) upregulation for all 3 genes, up to 410-fold higher than  
321  $t_0$  for *nifH* (798 transcripts at  $t_{24}$  vs 1 at  $t_0$ ; Fig. 3B).

322 We found that the vast majority of N cycling gene transcription could be attributed to  
323 bacteria and archaea (Fig. 4). Dissimilatory processes were largely from *Thaumarchaeota* and  
324 *Nitrospirae*, while assimilatory processes tended to be represented by *Proteobacteria*,  
325 *Actinobacteria*, and *Acidobacteria*. Nitrogen fixation was heavily dominated by *Proteobacteria*  
326 (Fig. 4).

327



## 328 *Regulation of N Cycling Genes*

329           Generally, transcripts of genes associated with regulation of N metabolism increased after  
330 glucose addition (Fig. S3; Fig. 5). The abundance of ATase and UTase (*glnD* and *glnE*), used for  
331 post-modification of glutamine synthetase (GS) and regulatory PII proteins respectively, initially  
332 increased at  $t_8$  ( $2.18 \pm 0.41$  LFC and  $4.31 \pm 0.36$  LFC; FDR < 0.01; Fig. S3; Fig. 5). UTase  
333 (*glnD*) but not ATase (*glnE*), continued to be significantly upregulated at  $t_{24}$  ( $3.79 \pm 0.36$  LFC)  
334 and  $t_{48}$  ( $2.75 \pm 0.36$  LFC; Fig. S3). Similar upregulation was noted for PII proteins GlnB (*glnB*;  
335 LFC > 2.9; FDR < 0.01; Fig. S3) and GlnK (*glnK*; LFC > 3.9; FDR < 0.01; Fig. S3), and the  
336 NtrC family genes *glnL* (FDR < 0.01) and *glnG* (FDR < 0.01 at  $t_8$  and  $t_{24}$ ; Fig. S3). No  
337 significant changes in transcript abundances were found for the transcriptional regulators *nac*  
338 and *lrp*, while *crp* and *rpoN* were slightly downregulated (LFC < -1) at  $t_8$  and  $t_{24}$  (FDR < 0.01;  
339 Fig. S3; Fig. 5).

340

## 341 *C Metabolism*

342           The LFC and total number of normalized transcripts for processes involved with glucose  
343 breakdown (KEGG modules M00001, M00003, M00004, M00008, and M00009). increased from  
344  $t_0$  to  $t_8$  and  $t_{24}$  (Fig. S4; Table S4; Tukey's HSD  $p < 0.05$ ). Significant changes in transcript  
345 abundance after glucose amendment were found for the Entner-Doudoroff pathway and TCA  
346 cycle, including the enzyme isocitrate dehydrogenase (*icd*) which produces oxoglutarate, a  
347 metabolite which directly connects C and N metabolism (Fig. 5; Fig. S4B, Table S4).

348

349 DISCUSSION

350 Over a period of 48-hours after glucose addition we observed a substantial decrease in  
351 K<sub>2</sub>SO<sub>4</sub> extractable organic C, an increase in CO<sub>2</sub> production rate, and an increase in the  
352 abundance of transcripts for genes associated with glucose breakdown. These changes coincided  
353 with a decrease in inorganic N and an increase in the transcript abundance of genes involved  
354 with inorganic N uptake, assimilation, and N metabolism regulation. These results demonstrate  
355 that soil microbial communities respond to labile C not only by upregulating genes associated  
356 with C metabolism, but also by rapidly increasing the transcription of genes responsible for N  
357 acquisition. Further, we found that genes for several forms of N acquisition (e.g., N fixation,  
358 assimilatory nitrate reduction, ammonium transport) were differentially transcribed over the 48 h  
359 incubation, indicating that changes in multiple microbially mediated N transformations occur  
360 within this small temporal window.

361

362 *Inorganic N Uptake and Assimilation*

363 The GS-GOGAT pathway appeared to be the predominant pathway through which  
364 ammonium was assimilated into biomass. The other main avenue of ammonium assimilation into  
365 biomass, the enzyme GDH, did not show a similar increase in transcript abundance and the  
366 abundance of GDH transcripts was substantially smaller than that of GS-GOGAT. This suggests  
367 that GS-GOGAT may be the dominant pathway for assimilation of inorganic N in soil microbial  
368 communities responding to labile C inputs. This finding is consistent with the notion that GDH is  
369 most active when NH<sub>4</sub><sup>+</sup> concentration is high and availability of C is low (27). Assays from soil  
370 microbial communities have also shown that GS activity increases in response to higher C to N  
371 ratios whereas GDH activity decreases (75). Further, we found that regulation of GDH

372 transcription appeared to be gene specific, with transcription for EC 1.4.1.4 increasing early and  
373 EC 1.4.1.2 increasing late. These results nicely follow concentrations of  $\text{NH}_4^+$ , as NADPH  
374 specific enzymes (EC 1.4.1.4) are generally used for ammonium assimilation (76) whereas  
375 NADH specific enzymes (EC 1.4.1.2) are commonly used for breakdown of glutamate to  
376 ammonium (77). These findings highlight the potential utility of measuring GDH and GS-  
377 GOGAT gene transcription for tracking the C and N balance within microbial communities at a  
378 given moment in time, which could be a useful approach when, for example, assessing how  
379 specific land use practices influence microbial metabolism and N cycling.

380         Various mechanisms for transporting inorganic N across the cell membrane were  
381 upregulated in response to glucose inputs. Notably, the gene *amtB*, which encodes for the  
382 ammonium transporter AmtB, was the second most abundant upregulated gene during the  
383 incubation (behind *glnA*). Similarly, we observed an upregulation of genes associated with  
384 nitrate and nitrite transport (KEGG module M00615) and assimilatory nitrate reduction, which  
385 coincided with a precipitous drop in the concentration of  $\text{NO}_3^-$ . Most genes involved with  
386 DNRA were not differentially expressed, indicating that nitrate reduction was primarily  
387 occurring under aerobic conditions. A notable exception were the genes *nirB* and *nirD*, which  
388 encode for the cytosolic enzyme nitrite reductase NirBD (78), which has been shown to be active  
389 in aerobic soils (79, 80) and may function as the nitrite reductase in assimilatory nitrate reduction  
390 (81). Although the upregulation of N transport genes in response to glucose is certainly not  
391 novel (30), these results are the first demonstration of this response in a soil microbial  
392 community metatranscriptome. Further, these responses show the short timeframes (within 8 h)  
393 in which soil microbial communities can respond to changes in C and N availability.

394           The finding that glucose addition strongly upregulated genes encoding for nitrogenase,  
395 especially when  $\text{NH}_4^+$  concentrations were low, is consistent with the idea that nitrogen fixation  
396 increases when N concentrations are low (82). N fixation has been shown to be activated by the  
397 addition of other limiting nutrients such as carbon or phosphorous (83, 84). We therefore believe  
398 that the upregulation of nitrogenase genes is a response to low concentrations of  $\text{NH}_4^+$  and  
399 availability of labile C. The prompt upregulation, and subsequent downregulation, of nitrogenase  
400 genes also suggests that some portion of biological nitrogen fixation occurs rapidly in soils, or at  
401 the very least that the process is highly sensitive to concentrations of  $\text{NH}_4^+$ .

402

#### 403 *Connections Between C and N Metabolism*

404           Interestingly, transcripts associated with  $\text{NH}_4^+$  and  $\text{NO}_3^-$  transport maintained their high  
405 abundances despite concentrations of  $\text{NO}_3^-$  stabilizing and concentrations of  $\text{NH}_4^+$  increasing (24-  
406 48 h into the incubation). One possible explanation is that the activity of these proteins is  
407 dictated through allosteric regulation which is tightly connected to the activity of both C and N  
408 metabolism (Fig. 5). For example, the ammonium transporter AmtB is allosterically inhibited by  
409 the PII protein GlnK which is indirectly controlled by internal concentrations of glutamine, an  
410 intermediate of N uptake through GS-GOGAT (Fig. 5), and oxoglutarate, an intermediate of the  
411 TCA cycle (Fig. 5; 29, 66). In this way, internal concentrations of metabolites from both C and N  
412 metabolism may dictate N uptake.

413           The transcription of N regulatory genes reflects the importance of intermediate  
414 metabolites in regulation. We found that abundance of transcripts for transcriptional regulators  
415 (such as *nac*, *lrp*, and *crp*) and  $\sigma^{54}$  were either not affected or slightly reduced (Fig. 5). In  
416 contrast, transcripts for genes in the phosphorylation cascade, which links C and N metabolism

417 through intermediate metabolites, were more abundant after the addition of glucose (Fig. 5). The  
418 upregulation of the two component regulatory NtrB (*glnL*, *ntrB*) and NtrC (*glnG*, *ntrC*) within  
419 this cascade is especially noteworthy, as this system regulates ~75 genes associated with N  
420 acquisition, including glutamine synthetase (Fig. 5) (86).

421         Since the activity of this regulatory network is tightly controlled by internal  
422 concentrations of metabolites (30), it is not possible to determine the activity of many of these  
423 proteins through the metatranscriptome alone. However, it is noteworthy that almost all of the  
424 genes within this regulatory network were upregulated, even if the encoded protein potentially  
425 inhibited N transport or assimilation (e.g. GlnK; Fig. 5). This broad upregulation of genes in the  
426 phosphorylation cascade may be beneficial during C uptake, as it allows the concentration of  
427 nutrients and metabolites to control N uptake, thereby ensuring N uptake matches the supply of  
428 C (25, 32).

429

#### 430 *Nitrification and Denitrification*

431         Most genes associated with nitrification and denitrification were significantly  
432 downregulated. Since nearly all nitrifiers in this soil were autotrophic archaea (55), this finding is  
433 consistent with the premise that addition of glucose reduces rates of autotrophic nitrification by  
434 reducing the amount of available ammonium (37). It is not especially surprising that we did not  
435 find an upregulation of denitrification genes, as denitrification is most prevalent in anoxic  
436 systems with high availabilities of nitrate.

437

#### 438 *Genetic Potential Versus Transcription*

439           Notably, although we did observe a slight shift in the functional composition of our  
440 metagenomes, these changes did not track those found in the metatranscriptomes in either  
441 magnitude or direction. Changes contributing the most to dissimilarity tended to be slight shifts  
442 in highly abundant genes, such as *rpoB*, *rpoC*, and *lacI*. We found interesting differences in the  
443 abundance of spore forming proteins as nutrient availability declined, however since many of  
444 these proteins were uncommon and in low abundance, the chance of obtaining a false positive is  
445 much greater and we are therefore cautious to draw any conclusions based on these data alone.  
446 Changes in gene abundance for most N cycling genes were absent. These results suggest that  
447 understanding the response of soil microbial communities to short-term changes in the  
448 environment necessitates looking beyond the metagenome, as consequential microbial responses  
449 occur through changes in gene-expression. This is in line with other studies where the  
450 composition of transcripts shifts over hours or days (12, 87), whereas shifts in metagenomic  
451 community composition have been shown to occur after weeks or months (72) .

452           Our work represents a preliminary look into the short-term transcriptional response of  
453 microbial communities in response to a change in C availability, however there are a number of  
454 considerations moving forward. More work needs to be done focusing on this response in a  
455 variety soils, as nutrient availability and other soil properties will undoubtedly influence this  
456 process. For example, soils high in C and low in N would likely not demonstrate a similar  
457 response as observed for this agricultural soil. Understanding how ecosystem properties  
458 influence the dynamics of transcriptional profiles is therefore necessary in determining short-  
459 term microbial contributions to biogeochemical cycling. Further, this work focused on a  
460 relatively short timeframe, however whether this increase in transcription persists or influences  
461 nutrient cycling on the scale of weeks to months remains to be seen. Finally, future efforts should

462 be made to observe these short-term effects *in situ*. Laboratory incubations are extremely useful  
463 for controlling environmental variables and isolating a particular response. However, it is likely  
464 that under field conditions, and in the presence of plant roots, factors other than C availability  
465 will affect the gene-expression at the same time and to different degrees, potential masking the  
466 response observed in this short-term laboratory experiment.

467

468

469 CONCLUSIONS

470           Our results indicate strong and rapid upregulation of genes associated with uptake of  
471 inorganic N, assimilatory nitrate and nitrite reduction, GS-GOGAT pathway, and the regulatory  
472 network underlying N cycling. Further, the majority of upregulation occurred in pathways which  
473 are largely aerobic and heterotrophic, suggesting that these processes dominate the short-term  
474 response to labile C in these soils. Perhaps most importantly, this work highlights the importance  
475 of microbial gene transcription in controlling short-term biogeochemical cycling in soils. Within  
476 the 48 h incubation we found that microbially mediated transformations of N were well reflected  
477 in the metatranscriptome but not in the metagenome or in microbial biomass. The short-term  
478 transcriptional responses of soil microbes may therefore serve an important role in determining  
479 how biogeochemical fluxes respond to immediate changes in the environment.



480 ACKNOWLEDGEMENTS

481           This work was supported by funding from the USDA National Institute of Food and  
482 Agriculture Foundational Program (award #2017-67019-26396) and additional support for PD  
483 was provided by the U.S. Department of Energy, Office of Biological and Environmental  
484 Research, Genomic Science Program LLNL ‘Microbes Persist’ Soil Microbiome Scientific  
485 Focus Area (award #SCW1632). The work conducted by the U.S. Department of Energy Joint  
486 Genome Institute, a DOE Office of Science User Facility, is supported under Contract No. DE-  
487 AC02-05CH11231.

488           We would like to thank Rebecca Mau, Michaela Hayer, Alicia Purcell, and Ayla Martinez  
489 for their assistance with laboratory analyses; Sam Bunkers, Kieston Guidry, and Kiara Nelson  
490 for their help downloading and cleaning the data; and Isaac Shaffer for his assistance with the  
491 analysis. We would also like to thank the Joint Genome Institute for their work in sequencing  
492 and assembly, specifically: Marcel Huntemann, Alicia Clum, Brian Foster, Bryce Foster, Simon  
493 Roux, Krishnaveni Palaniappan, Neha Varghese, Supratim Mukherjee, T.B.K. Reddy, Chris  
494 Daum, Alex Copeland, Natalia N. Ivanova, Nikos C. Kyrpides, Tijana Glavina del Rio, and  
495 Emiley A. Eloë-Fadrosh.  
496

497 Competing interests:

498 The authors have no competing interests to disclose

499

500 REFERENCES

- 501 1. LeBauer DS, Treseder KK. 2008. Nitrogen limitation of net primary productivity in  
502 terrestrial ecosystems is globally distributed. *Ecology* 89:371–379.
- 503 2. Skiba U, Smith KA. 2000. The control of nitrous oxide emissions from agricultural and  
504 natural soils. *Chemosph - Glob Chang Sci* 2:379–386.
- 505 3. Camargo JA, Alonso Á. 2006. Ecological and toxicological effects of inorganic nitrogen  
506 pollution in aquatic ecosystems: A global assessment. *Environ Int* 32:831–849.
- 507 4. Mooshammer M, Wanek W, Hämmerle I, Fuchslueger L, Hofhansl F, Knoltsch A,  
508 Schneckner J, Takriti M, Watzka M, Wild B, Keiblinger KM, Zechmeister-Boltenstern S,  
509 Richter A. 2014. Adjustment of microbial nitrogen use efficiency to carbon:Nitrogen  
510 imbalances regulates soil nitrogen cycling. *Nat Commun* 5:1–7.
- 511 5. Hallin S, Jones CM, Schloter M, Philippot L. 2009. Relationship between n-cycling  
512 communities and ecosystem functioning in a 50-year-old fertilization experiment. *ISME J*  
513 3:597–605.
- 514 6. Batista MB, Dixon R. 2019. Manipulating nitrogen regulation in diazotrophic bacteria for  
515 agronomic benefit. *Biochem Soc Trans* 47:603–614.
- 516 7. Marzluf GA. 1997. Genetic regulation of nitrogen metabolism in the fungi. *Microbiol Mol*  
517 *Biol Rev* 61:17–32.
- 518 8. Reitzer L. 2003. Nitrogen assimilation and global regulation in *Escherichia coli*. *Annu*  
519 *Rev Microbiol* 57:155–176.
- 520 9. Cebolla A, Palomares AJ. 1994. Genetic regulation of nitrogen fixation in *Rhizobium*  
521 *meliloti*. *Microbiologia* 10:371–384.
- 522 10. Kuzyakov Y, Blagodatskaya E. 2015. Microbial hotspots and hot moments in soil:

- 523 Concept & review. *Soil Biol Biochem* 83:184–199.
- 524 11. Albright MBN, Johansen R, Lopez D, Gallegos-Graves LV, Steven B, Kuske CR, Dunbar  
525 J. 2018. Short-term transcriptional response of microbial communities to nitrogen  
526 fertilization in a pine forest soil. *Appl Environ Microbiol* 84:e00598-18.
- 527 12. León-Sobrino C, Ramond J-B, Maggs-Kölling G, Cowan DA. 2019. Nutrient acquisition,  
528 rather than stress response over diel cycles, drives microbial transcription in a hyper-arid  
529 Namib Desert soil. *Front Microbiol* 10:1054.
- 530 13. Coskun D, Britto DT, Shi W, Kronzucker HJ. 2017. How plant root exudates shape the  
531 nitrogen cycle. *Trends Plant Sci* 22:661–673.
- 532 14. Trap J, Bonkowski M, Plassard C, Villenave C, Blanchart E. 2016. Ecological importance  
533 of soil bacterivores for ecosystem functions. *Plant Soil* 398:1–24.
- 534 15. Trubl G, Jang H Bin, Roux S, Emerson JB, Solonenko N, Vik DR, Solden L, Ellenbogen  
535 J, Runyon AT, Bolduc B, Woodcroft BJ, Saleska SR, Tyson GW, Wrighton KC, Sullivan  
536 MB, Rich VI. 2018. Soil Viruses Are Underexplored Players in Ecosystem Carbon  
537 Processing. *mSystems* 3:1–21.
- 538 16. Kuzyakov Y. 2010. Priming effects: Interactions between living and dead organic matter.  
539 *Soil Biol Biochem* 42:1363–1371.
- 540 17. Demoling F, Figueroa D, Bååth E. 2007. Comparison of factors limiting bacterial growth  
541 in different soils. *Soil Biol Biochem* 39:2485–2495.
- 542 18. Hobbie JE, Hobbie EA. 2013. Microbes in nature are limited by carbon and energy: the  
543 starving-survival lifestyle in soil and consequences for estimating microbial rates. *Front*  
544 *Microbiol* 4:324.
- 545 19. Schimel JP, Weintraub MN. 2003. The implications of exoenzyme activity on microbial

- 546 carbon and nitrogen limitation in soil: a theoretical model. *Soil Biol Biochem* 35:549–563.
- 547 20. Papp K, Hungate BA, Schwartz E. 2019. Glucose triggers strong taxon-specific  
548 responses in microbial growth and activity: insights from DNA and RNA qSIP. *Ecology*  
549 *ecy*.2887.
- 550 21. Kamble PN, Bååth E. 2014. Induced N-limitation of bacterial growth in soil: Effect of  
551 carbon loading and N status in soil. *Soil Biol Biochem* 74:11–20.
- 552 22. Geisseler D, Horwath WR, Joergensen RG, Ludwig B. 2010. Pathways of nitrogen  
553 utilization by soil microorganisms - A review. *Soil Biol Biochem* 42:2058–2067.
- 554 23. Yang L, Zhang L, Geisseler D, Wu Z, Gong P, Xue Y, Yu C, Juan Y, Horwath WR. 2016.  
555 Available C and N affect the utilization of glycine by soil microorganisms. *Geoderma*  
556 283:32–38.
- 557 24. Geisseler D, Horwath WR. 2008. Regulation of extracellular protease activity in soil in  
558 response to different sources and concentrations of nitrogen and carbon. *Soil Biol*  
559 *Biochem* 40:3040–3048.
- 560 25. Chubukov V, Gerosa L, Kochanowski K, Sauer U. 2014. Coordination of microbial  
561 metabolism. *Nat Rev Microbiol* 12:327–340.
- 562 26. Yuan J, Doucette CD, Fowler WU, Feng X, Piazza M, Rabitz HA, Wingreen NS,  
563 Rabinowitz JD. 2009. Metabolomics-driven quantitative analysis of ammonia  
564 assimilation in *E. coli*. *Mol Syst Biol* 5:302.
- 565 27. Sharkey MA, Engel PC. 2008. Apparent negative co-operativity and substrate inhibition in  
566 overexpressed glutamate dehydrogenase from *Escherichia coli*. *FEMS Microbiol Lett*  
567 281:132–139.
- 568 28. Lin JT, Stewart V. 1997. Nitrate assimilation by bacteria. *Adv Microb Physiol* 39:1–30.

- 569 29. Zehr JP, Turner PJ. 2001. Nitrogen fixation: Nitrogenase genes and gene expression.  
570 Methods Microbiol 30:271–286.
- 571 30. van Heeswijk WC, Westerhoff H V., Boogerd FC. 2013. Nitrogen assimilation in  
572 *Escherichia coli*: Putting molecular data into a systems perspective. Microbiol Mol Biol  
573 Rev 77:628–695.
- 574 31. Merrick MJ. 1993. In a class of its own — the RNA polymerase sigma factor  $\sigma_{54}$  ( $\sigma_N$ ).  
575 Mol Microbiol 10:903–909.
- 576 32. Huergo LF, Dixon R. 2015. The emergence of 2-oxoglutarate as a master regulator  
577 metabolite. Microbiol Mol Biol Rev 79:419–35.
- 578 33. Stein LY, Klotz MG. 2016. The nitrogen cycle. Curr Biol 26:R94–R98.
- 579 34. Daims H, Lebedeva E V., Pjevac P, Han P, Herbold C, Albertsen M, Jehmlich N,  
580 Palatinszky M, Vierheilig J, Bulaev A, Kirkegaard RH, Von Bergen M, Rattei T,  
581 Bendinger B, Nielsen PH, Wagner M. 2015. Complete nitrification by *Nitrospira* bacteria.  
582 Nature 528:504–509.
- 583 35. Van Kessel MAHJ, Speth DR, Albertsen M, Nielsen PH, Op Den Camp HJM, Kartal B,  
584 Jetten MSM, Lückner S. 2015. Complete nitrification by a single microorganism. Nature  
585 528:555–559.
- 586 36. Hu H-W, Chen D, He J-Z. 2015. Microbial regulation of terrestrial nitrous oxide  
587 formation: understanding the biological pathways for prediction of emission rates. FEMS  
588 Microbiol Rev 021:729–749.
- 589 37. Verhagen FJM, Duyts H, Laanbroek HJ. 1992. Competition for ammonium between  
590 nitrifying and heterotrophic bacteria in continuously percolated soil columns. Appl  
591 Environ Microbiol 58:3303–3311.

- 592 38. Lan T, Liu R, Suter H, Deng O, Gao X, Luo L, Yuan S, Wang C, Chen D. 2020.  
593 Stimulation of heterotrophic nitrification and N<sub>2</sub>O production, inhibition of autotrophic  
594 nitrification in soil by adding readily degradable carbon. *J Soils Sediments* 20:81–90.
- 595 39. Tiedje JM, Sexstone AJ, Myrold DD, Robinson JA. 1983. Denitrification: ecological  
596 niches, competition and survival. *Antonie Van Leeuwenhoek* 48:569–583.
- 597 40. Henderson SL, Dandie CE, Patten CL, Zebarth BJ, Burton DL, Trevors JT, Goyer C.  
598 2010. Changes in denitrifier abundance, denitrification gene mRNA levels, nitrous oxide  
599 emissions, and denitrification in anoxic soil microcosms amended with glucose and plant  
600 residues. *Appl Environ Microbiol* 76:2155–2164.
- 601 41. Carvalhais LC, Dennis PG, Tyson GW, Schenk PM. 2012. Application of  
602 metatranscriptomics to soil environments. *J Microbiol Methods* 91:246–251.
- 603 42. Moran MA. 2009. Metatranscriptomics: Eavesdropping on complex microbial  
604 communities. *Microbe* 4:329.
- 605 43. Helbling DE, Ackermann M, Fenner K, Kohler HPE, Johnson DR. 2012. The activity  
606 level of a microbial community function can be predicted from its metatranscriptome.  
607 *ISME J* 6:902–904.
- 608 44. Nacke H, Fischer C, Thürmer A, Meinicke P, Daniel R. 2014. Land use type significantly  
609 affects microbial gene transcription in soil. *Microb Ecol* 67:919–930.
- 610 45. Damon C, Lehembre F, Oger-Desfeux C, Luis P, Ranger J, Fraissinet-Tachet L,  
611 Marmeisse R. 2012. Metatranscriptomics reveals the diversity of genes expressed by  
612 eukaryotes in forest soils. *PLoS One* 7:e28967.
- 613 46. Žifčáková L, Větrovský T, Howe A, Baldrian P. 2016. Microbial activity in forest soil  
614 reflects the changes in ecosystem properties between summer and winter. *Environ*

- 615 Microbiol 18:288–301.
- 616 47. Kim Y, Liesack W. 2015. Differential assemblage of functional units in paddy soil  
617 microbiomes. PLoS One 10:e0122221.
- 618 48. Bei Q, Moser G, Wu X, Müller C, Liesack W. 2019. Metatranscriptomics reveals climate  
619 change effects on the rhizosphere microbiomes in European grassland. Soil Biol Biochem  
620 138:107604.
- 621 49. Baldrian P, Kolařík M, Štursová M, Kopecký J, Valášková V, Větrovský T, Žifčáková L,  
622 Šnajdr J, Rídl J, Vlček Č, Voříšková J. 2012. Active and total microbial communities in  
623 forest soil are largely different and highly stratified during decomposition. ISME J 6:248–  
624 258.
- 625 50. Anderson TH, Domsch KH. 1985. Maintenance carbon requirements of actively-  
626 metabolizing microbial populations under in situ conditions. Soil Biol Biochem 17:197–  
627 203.
- 628 51. Van Hees PAW, Jones DL, Finlay R, Godbold DL, Lundström US. 2005. The carbon we  
629 do not see - The impact of low molecular weight compounds on carbon dynamics and  
630 respiration in forest soils: A review. Soil Biol Biochem 37:1–13.
- 631 52. Reischke S, Rousk J, Bååth E. 2014. The effects of glucose loading rates on bacterial and  
632 fungal growth in soil. Soil Biol Biochem 70:88–95.
- 633 53. Reischke S, Kumar MGK, Bååth E. 2015. Threshold concentration of glucose for bacterial  
634 growth in soil. Soil Biol Biochem 80:218–223.
- 635 54. Pena-Yewtukhiw EM, Romano EL, Waterland NL, Grove JH. 2017. Soil health indicators  
636 during transition from row crops to grass–legume sod. Soil Sci Soc Am J 0:0.
- 637 55. Walkup J, Freedman Z, Kotcon J, Morrissey EM. 2020. Pasture in crop rotations



- 638 influences microbial biodiversity and function reducing the potential for nitrogen loss  
639 from compost. *Agric Ecosyst Environ* 304.
- 640 56. Birch HF. 1958. The effect of soil drying on humus decomposition and nitrogen  
641 availability. *Plant Soil* 10:9–31.
- 642 57. Barnard RL, Blazewicz SJ, Firestone MK. 2020. Citation Classic Rewetting of soil:  
643 Revisiting the origin of soil CO<sub>2</sub> emissions. *Soil Biol Biochem* 147:107819.
- 644 58. Brookes PC, Landman A, Pruden G, Jenkinson DS. 1985. Chloroform fumigation and the  
645 release of soil nitrogen: A rapid direct extraction method to measure microbial biomass  
646 nitrogen in soil. *Soil Biol Biochem* 17:837–842.
- 647 59. Dijkstra P, Dalder JJ, Selmants PC, Hart SC, Koch GW, Schwartz E, Hungate BA. 2011.  
648 Modeling soil metabolic processes using isotopologue pairs of position-specific <sup>13</sup>C-  
649 labeled glucose and pyruvate. *Soil Biol Biochem* 43:1848–1857.
- 650 60. Nordberg H, Cantor M, Dusheyko S, Hua S, Poliakov A, Shabalov I, Smirnova T,  
651 Grigoriev I V., Dubchak I. 2014. The genome portal of the Department of Energy Joint  
652 Genome Institute: 2014 updates. *Nucleic Acids Res* 42.
- 653 61. Chuckran PF, Huntemann M, Clum A, Foster B, Foster B, Roux S, Palaniappan K,  
654 Varghese N, Mukherjee S, Reddy TBK, Daum C, Copeland A, Ivanova NN, Kyrpides  
655 NC, del Rio TG, Eloe-Fadrosh EA, Morrissey EM, Schwartz E, Fofanov V, Hungate B,  
656 Dijkstra P. 2020. Metagenomes and Metatranscriptomes of a Glucose-Amended  
657 Agricultural Soil. *Microbiol Resour Announc* 9.
- 658 62. Li D, Liu CM, Luo R, Sadakane K, Lam TW. 2015. MEGAHIT: An ultra-fast single-node  
659 solution for large and complex metagenomics assembly via succinct de Bruijn graph.  
660 *Bioinformatics* 31:1674–1676.

- 661 63. Bankevich A, Nurk S, Antipov D, Gurevich AA, Dvorkin M, Kulikov AS, Lesin VM,  
662 Nikolenko SI, Pham S, Prjibelski AD, Pyshkin A V., Sirotkin A V., Vyahhi N, Tesler G,  
663 Alekseyev MA, Pevzner PA. 2012. SPAdes: A new genome assembly algorithm and its  
664 applications to single-cell sequencing. *J Comput Biol* 19:455–477.
- 665 64. Chen I-MA, Chu K, Palaniappan K, Pillay M, Ratner A, Huang J, Huntemann M,  
666 Varghese N, White JR, Seshadri R, Smirnova T, Kirton E, Jungbluth SP, Woyke T, Elo-  
667 Fadrosch EA, Ivanova NN, Kyrpides NC. 2019. IMG/M v.5.0: an integrated data  
668 management and comparative analysis system for microbial genomes and microbiomes.  
669 *Nucleic Acids Res* 47:D666–D677.
- 670 65. Kanehisa M, Goto S. 2000. Yeast Biochemical Pathways. KEGG: Kyoto encyclopedia of  
671 genes and genomes. *Nucleic Acids Res* 28:27–30.
- 672 66. Huber W, Carey VJ, Gentleman R, Anders S, Carlson M, Carvalho BS, Bravo HC, Davis  
673 S, Gatto L, Girke T, Gottardo R, Hahne F, Hansen KD, Irizarry RA, Lawrence M, Love  
674 MI, MaCdonald J, Obenchain V, Oles  $\square$  AK, Pagès H, Reyes A, Shannon P, Smyth GK,  
675 Tenenbaum D, Waldron L, Morgan M. 2015. Orchestrating high-throughput genomic  
676 analysis with Bioconductor. *Nat Methods* 12:115–121.
- 677 67. Love MI, Huber W, Anders S. 2014. Moderated estimation of fold change and dispersion  
678 for RNA-seq data with DESeq2. *Genome Biol* 15.
- 679 68. Conesa A, Madrigal P, Tarazona S, Gomez-Cabrero D, Cervera A, McPherson A,  
680 Szczesniak MW, Gaffney DJ, Elo LL, Zhang X, Mortazavi A. 2016. A survey of best  
681 practices for RNA-seq data analysis. *Genome Biol* 17:13.
- 682 69. Oksanen AJ, Blanchet FG, Kindt R, Legendre P, Minchin PR, Hara RBO, Simpson GL,  
683 Solymos P, Stevens MHH. 2019. *vegan: Community Ecology Package*.

- 684 70. Kanehisa M, Sato Y. 2019. KEGG Mapper for inferring cellular functions from protein  
685 sequences. *Protein Sci.*
- 686 71. Wickham H. 2016. *ggplot2: Elegant Graphics for Data Analysis*. Springer-Verlag New  
687 York.
- 688 72. Team RC. 2018. R: A language and environment for statistical computing. R Found Stat  
689 Comput Vienna, Austria.
- 690 73. Mooshammer M, Wanek W, Zechmeister-Boltenstern S, Richter A. 2014. Stoichiometric  
691 imbalances between terrestrial decomposer communities and their resources: Mechanisms  
692 and implications of microbial adaptations to their resources. *Front Microbiol* 5:22.
- 693 74. Smith EL, Austen BM, Blumenthal KM, Nyc JF. 1975. *Glutamate  
694 Dehydrogenases* Enzymes 3rd ed. Academic Press.
- 695 75. Geisseler D, Doane TA, Horwath WR. 2009. Determining potential glutamine synthetase  
696 and glutamate dehydrogenase activity in soil. *Soil Biol Biochem* 41:1741–1749.
- 697 76. Duncan PA, White BA, Mackie RI. 1992. Purification and properties of NADP-dependent  
698 glutamate dehydrogenase from *Ruminococcus flavefaciens* FD-1. *Appl Environ Microbiol*  
699 58:4032–4037.
- 700 77. Miller SM, Magasanik B. 1990. Role of NAD-linked glutamate dehydrogenase in nitrogen  
701 metabolism in *Saccharomyces cerevisiae*. *J Bacteriol* 172:4927–4935.
- 702 78. Cole J. 1996. Nitrate reduction to ammonia by enteric bacteria: redundancy, or a strategy  
703 for survival during oxygen starvation? *FEMS Microbiol Lett* 136:1–11.
- 704 79. Ruiz B, Le Scornet A, Sauviac L, Rémy A, Bruand C, Meilhoc E. 2019. The nitrate  
705 assimilatory pathway in *Sinorhizobium meliloti*: Contribution to NO production. *Front  
706 Microbiol* 10:1526.

- 707 80. Pathan SI, Větrovský T, Giagnoni L, Datta R, Baldrian P, Nannipieri P, Renella G. 2018.  
708 Microbial expression profiles in the rhizosphere of two maize lines differing in N use  
709 efficiency. *Plant Soil* 433:401–413.
- 710 81. Stolz JF, Basu P. 2002. Evolution of nitrate reductase: Molecular and structural variations  
711 on a common function. *ChemBioChem* 3:198–206.
- 712 82. Dixon R, Kahn D. 2004. Genetic regulation of biological nitrogen fixation. *Nat Rev*  
713 *Microbiol* 2:621–631.
- 714 83. Benner JW, Vitousek PM. 2007. Development of a diverse epiphyte community in  
715 response to phosphorus fertilization. *Ecol Lett* 10:628–636.
- 716 84. Vitousek PM, Menge DNL, Reed SC, Cleveland CC. 2013. Biological nitrogen fixation:  
717 Rates, patterns and ecological controls in terrestrial ecosystems. *Philos Trans R Soc B*  
718 *Biol Sci* 368:1–9.
- 719 85. Coutts G. 2002. Membrane sequestration of the signal transduction protein GlnK by the  
720 ammonium transporter AmtB. *EMBO J* 21:536–545.
- 721 86. Zimmer DP, Soupene E, Lee HL, Wendisch VF, Khodursky AB, Peter BJ, Bender RA,  
722 Kustu S. 2000. Nitrogen regulatory protein C-controlled genes of *Escherichia coli*:  
723 Scavenging as a defense against nitrogen limitation. *Proc Natl Acad Sci U S A* 97:14674–  
724 14679.
- 725 87. Nuccio EE, Starr E, Karaoz U, Brodie EL, Zhou J, Tringe SG, Malmstrom RR, Woyke T,  
726 Banfield JF, Firestone MK, Pett-Ridge J. 2020. Niche differentiation is spatially and  
727 temporally regulated in the rhizosphere. *ISME J* 14:999–1014.
- 728 88. Mau RL, Liu CM, Aziz M, Schwartz E, Dijkstra P, Marks JC, Price LB, Keim P, Hungate  
729 BA. 2015. Linking soil bacterial biodiversity and soil carbon stability. *ISME J* 9:1477–

730            1480.

731

732 FIGURES

733 **Figure 1.** Mean concentration ( $\pm$  SE) of nitrate (A), ammonium (B), rate of carbon dioxide

734 production (C), and  $K_2SO_4$ -extractable C (D) as a function of time after glucose amendments.

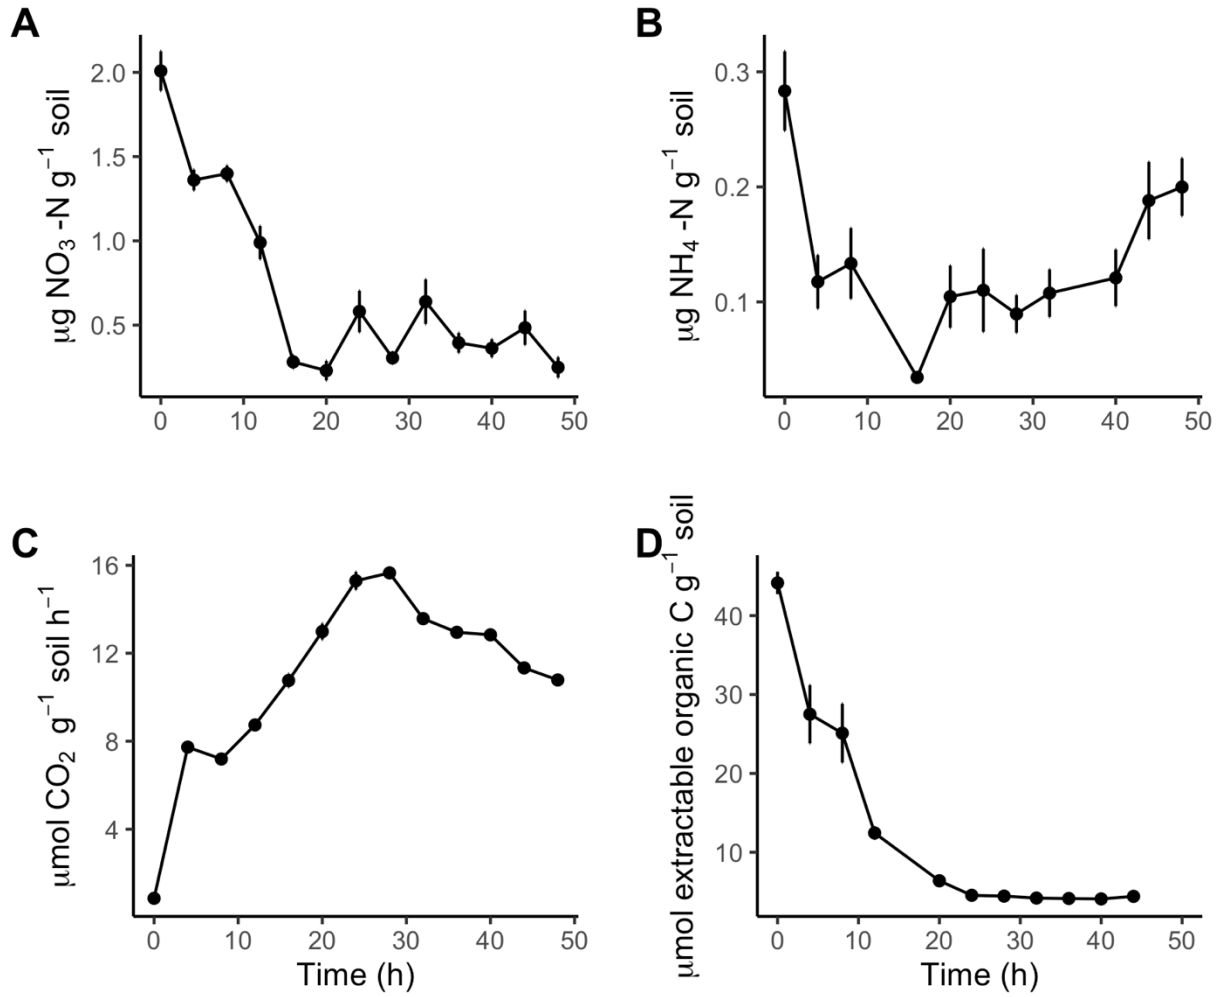

735

736

737 **Figure 2.** NMDS using Bray-Curtis distance of normalized KEGG annotation abundance for  
738 metagenomes (**A**) and metatranscriptomes (**B**) at 0, 8, 24, and 48 hours after the addition of  
739 glucose.

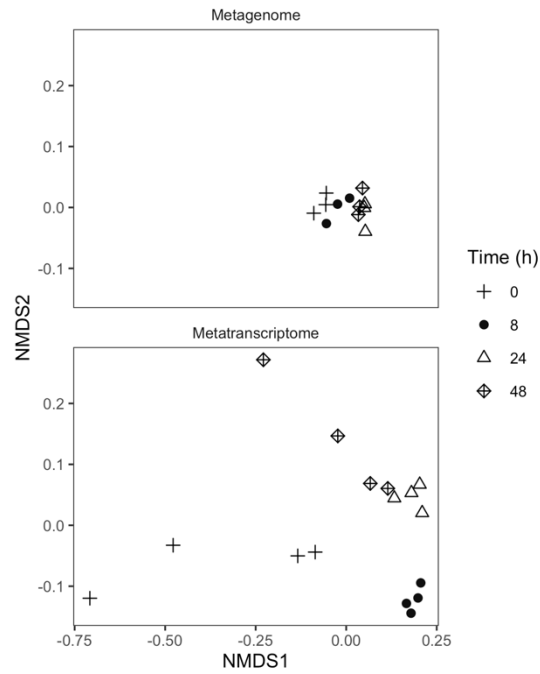

740

741

742

743 **Figure 3. (A)** Log<sub>2</sub>-fold changes (mean LFC ± SE) relative to t<sub>0</sub> of normalized gene (left) and  
744 transcript (right) abundances versus normalized counts for N cycling genes from glucose-  
745 amended soils. LFC and normalized counts represent the average between t<sub>8</sub>, t<sub>24</sub>, and t<sub>48</sub> for each  
746 gene. **(B)** Log<sub>2</sub>-fold changes in transcript abundances for genes grouped by biologically relevant  
747 reactions and pathways. A black asterisk indicates a significant change relative to t<sub>0</sub>.  
748



**A**

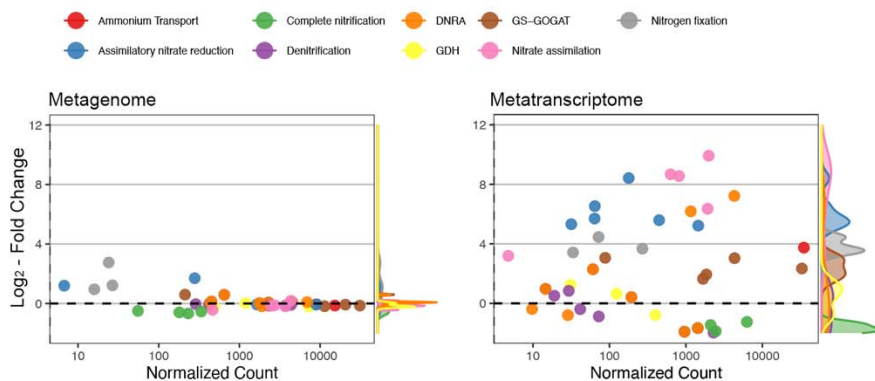

**B**

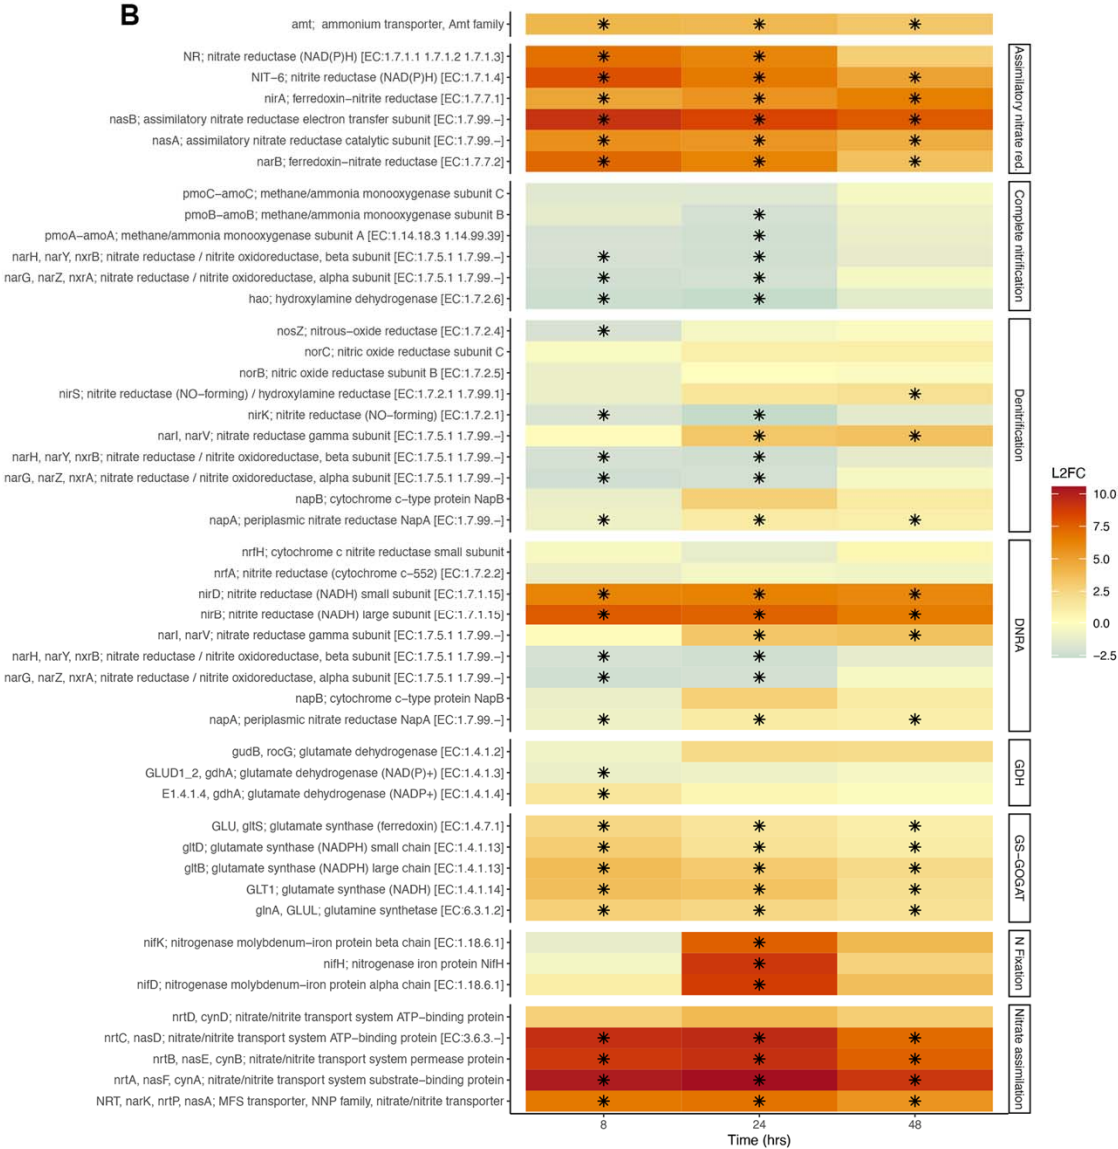

749

750  
751  
752

**Figure 4.** Relative transcript abundance of major taxa for reactions and pathways of N-cycling at 0, 8, 24, and 48 hours after glucose amendments.

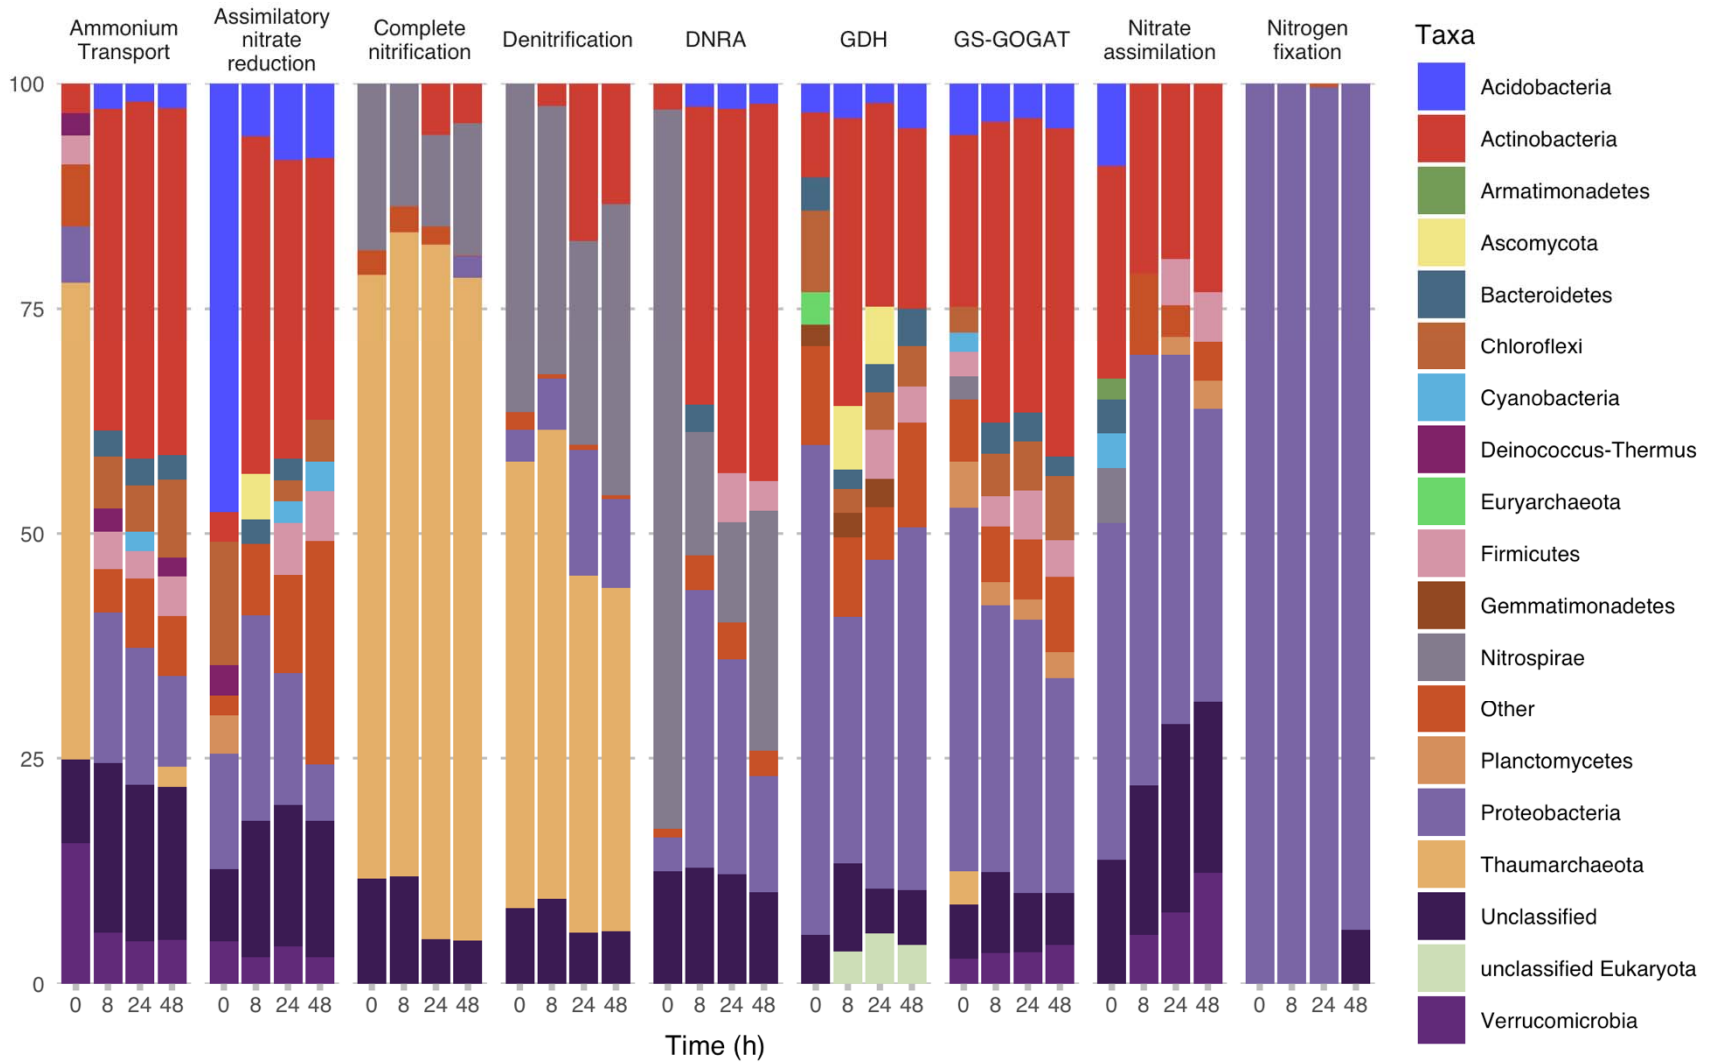

753

42

754 **Figure 5.** Abundance and  $\log_2$ -fold change of transcripts 8 h after glucose addition of C and N  
755 metabolism including glycolysis, the TCA cycle, N regulatory network, and GS-GOGAT. Color  
756 represents  $\log_2$ -fold change of transcript abundances relative to  $t_0$ , and size indicates number of  
757 transcripts. Thin black arrows indicate reactants or products of pathways and grey arrows  
758 represent regulatory controls. Gene names are presented in white boxes (ex. *glnA*), whereas  
759 pathway or enzyme names are presented in bold (ex. GS or Glycolysis).

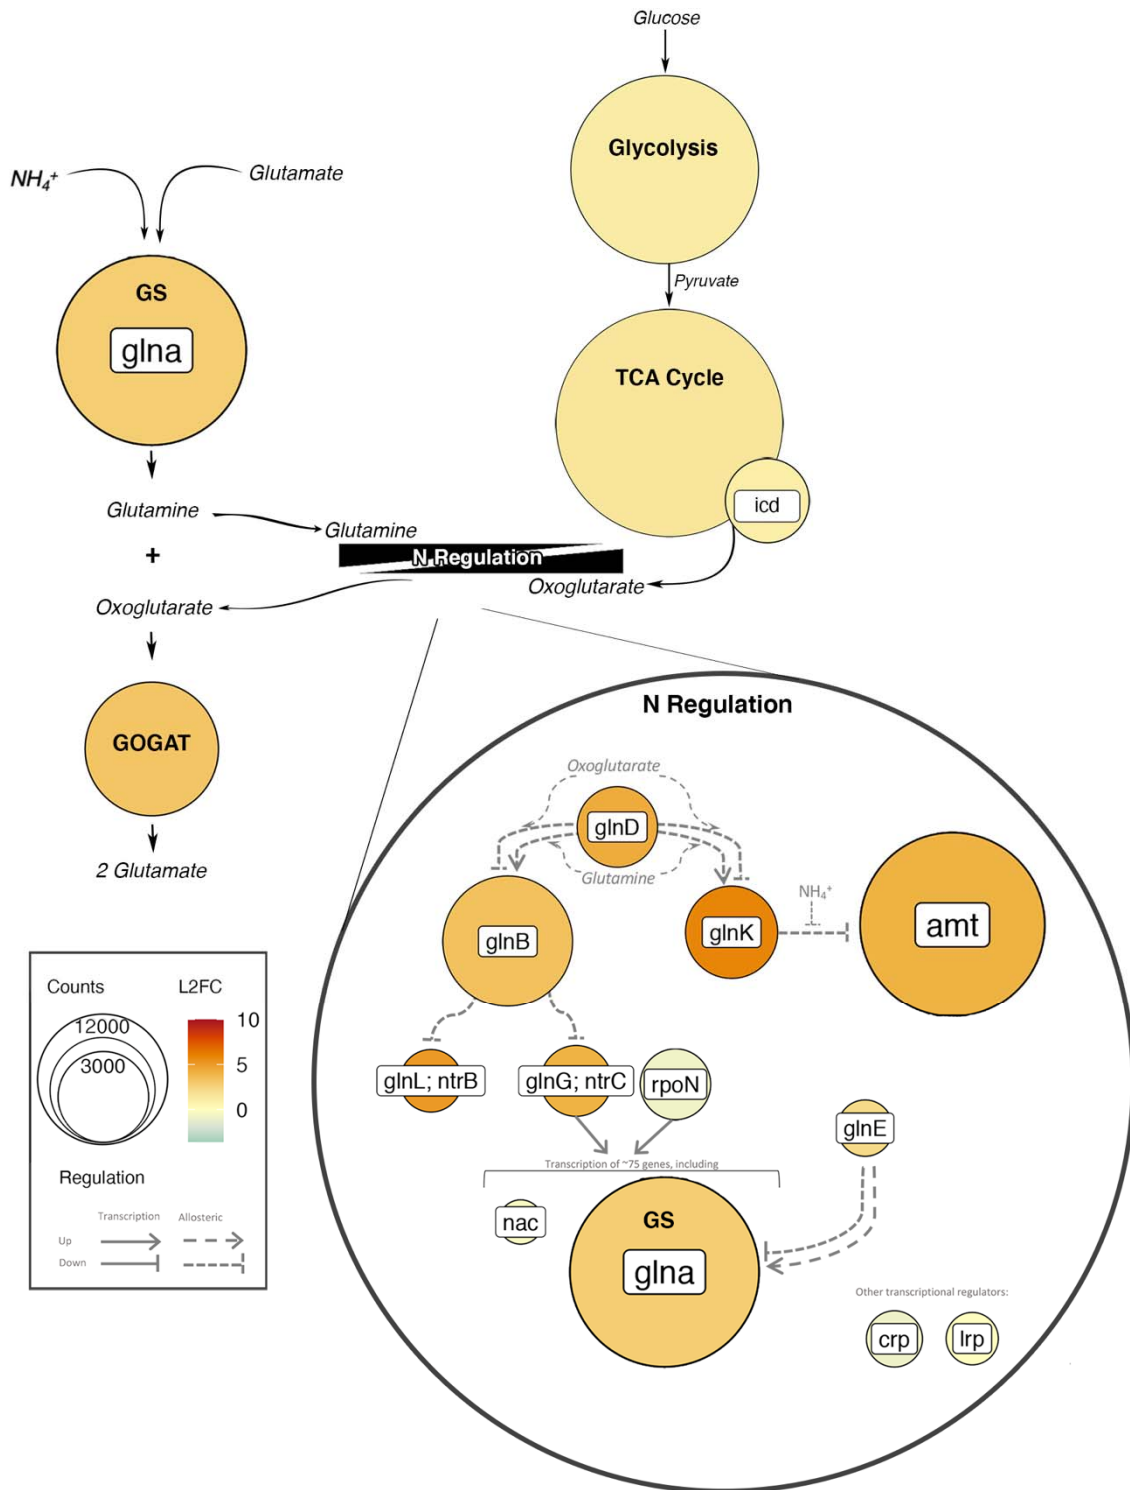

760

761
